# Supplementary material
Source: ML conference proceedings conference paper supplement (https://openreview.net/forum?id=TSZh4610VG)

Source

CoTTA

SATA

Ours

noise

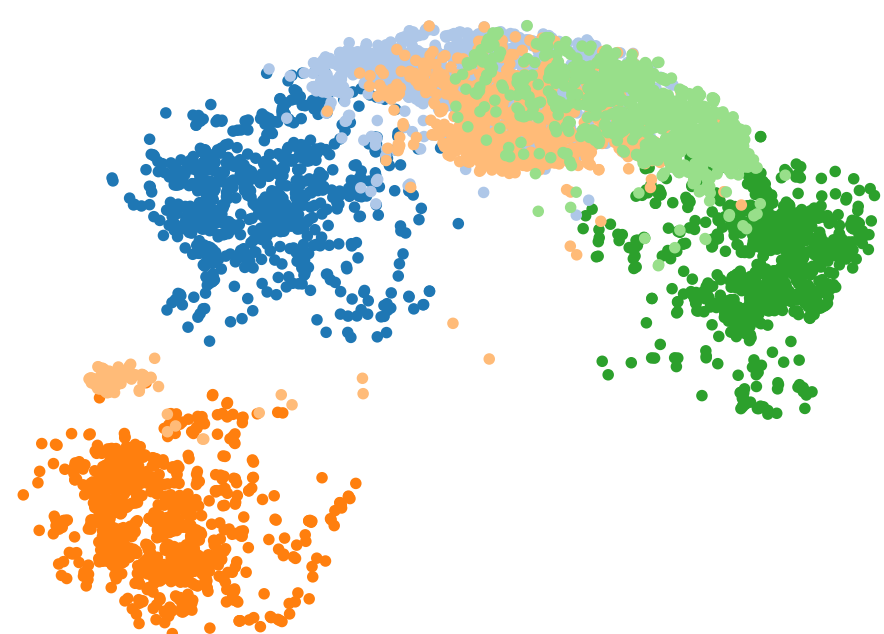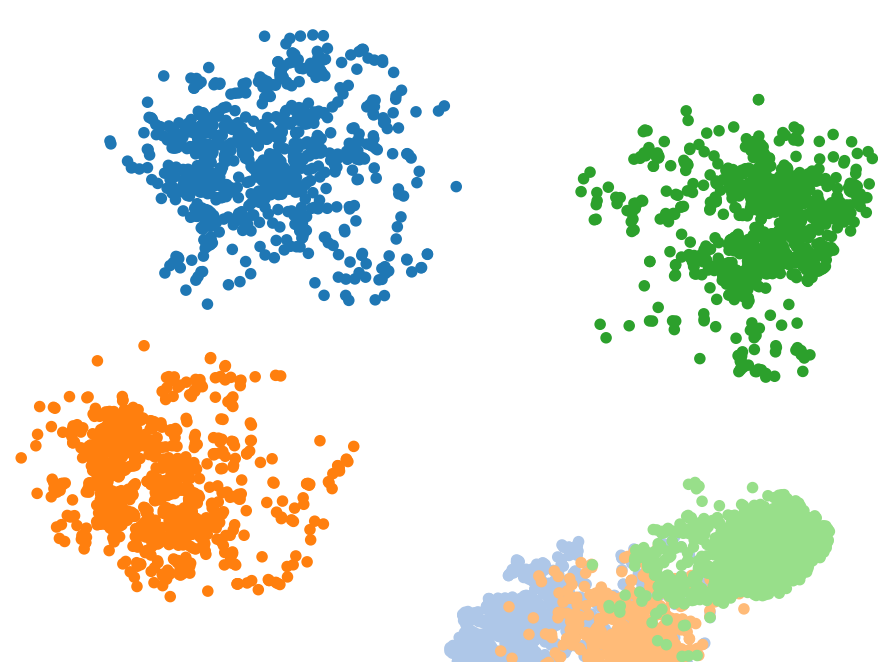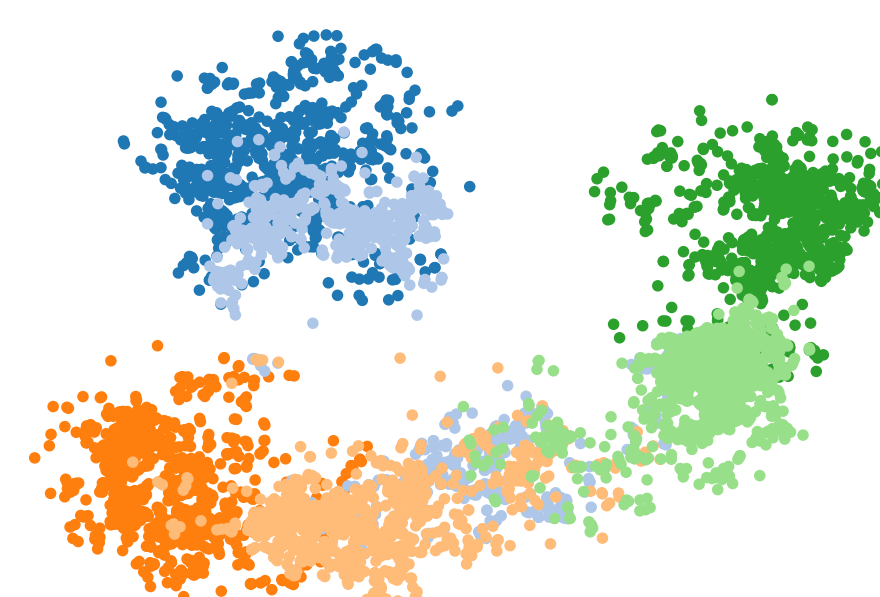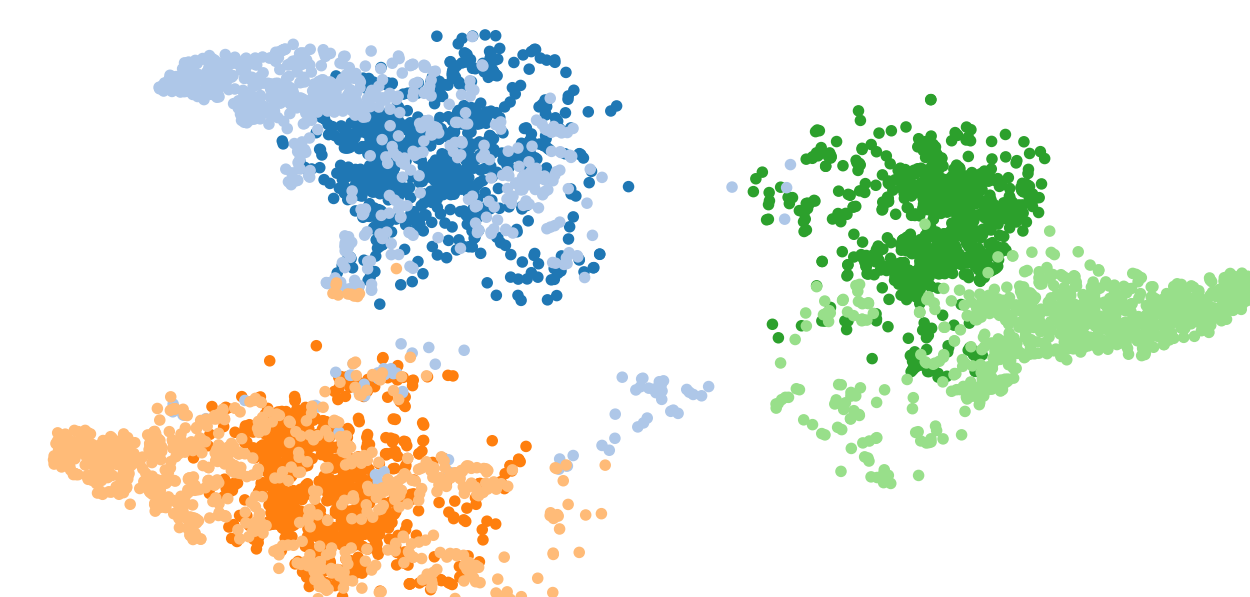

blur

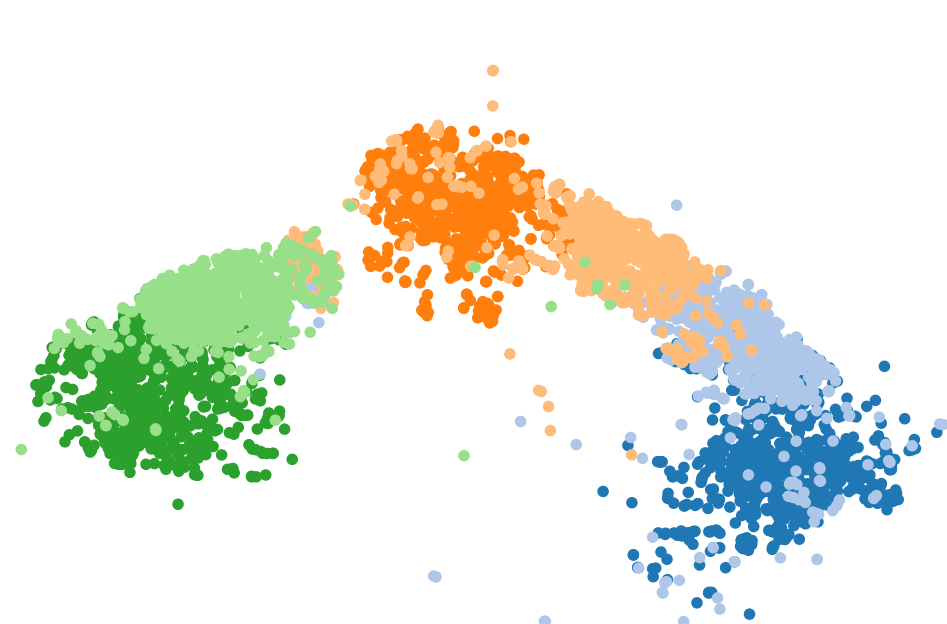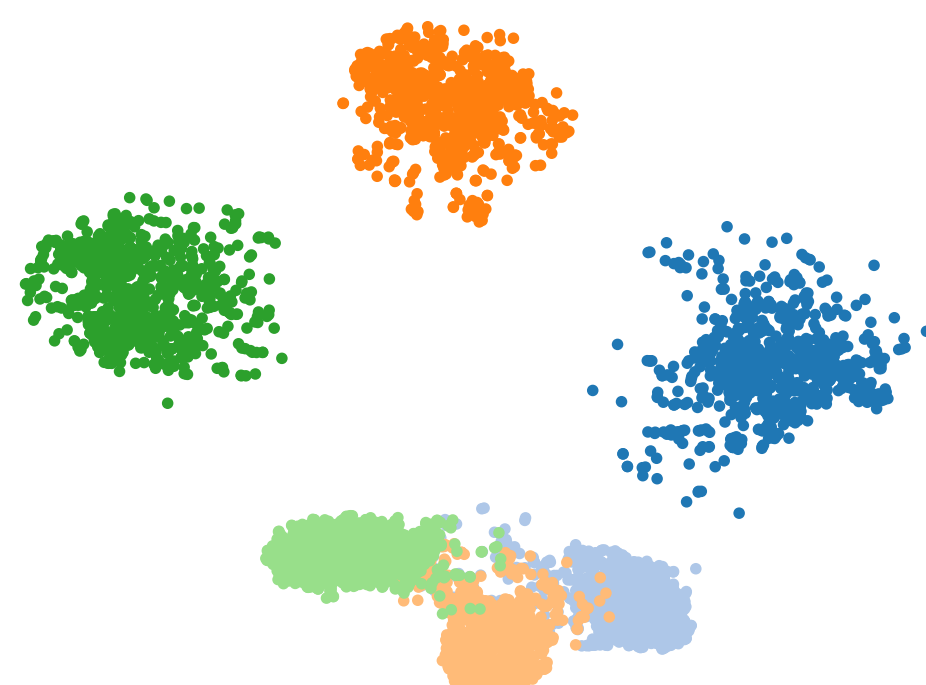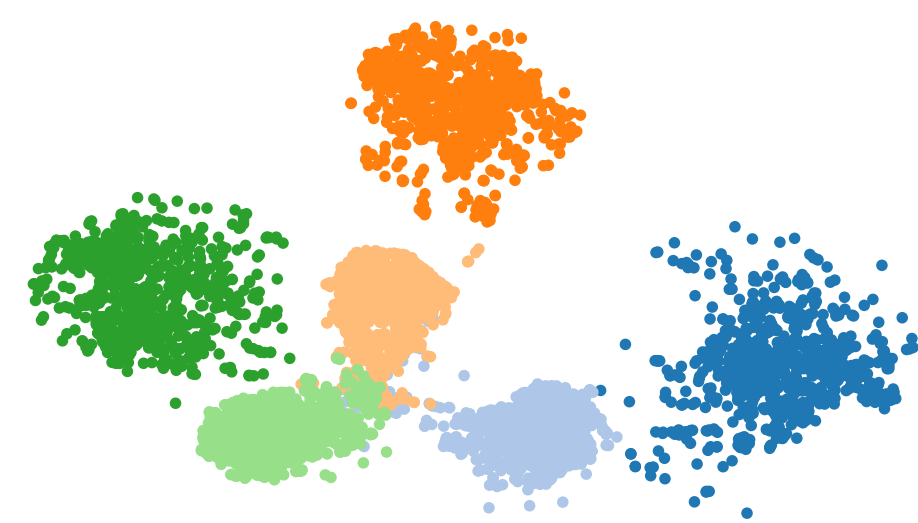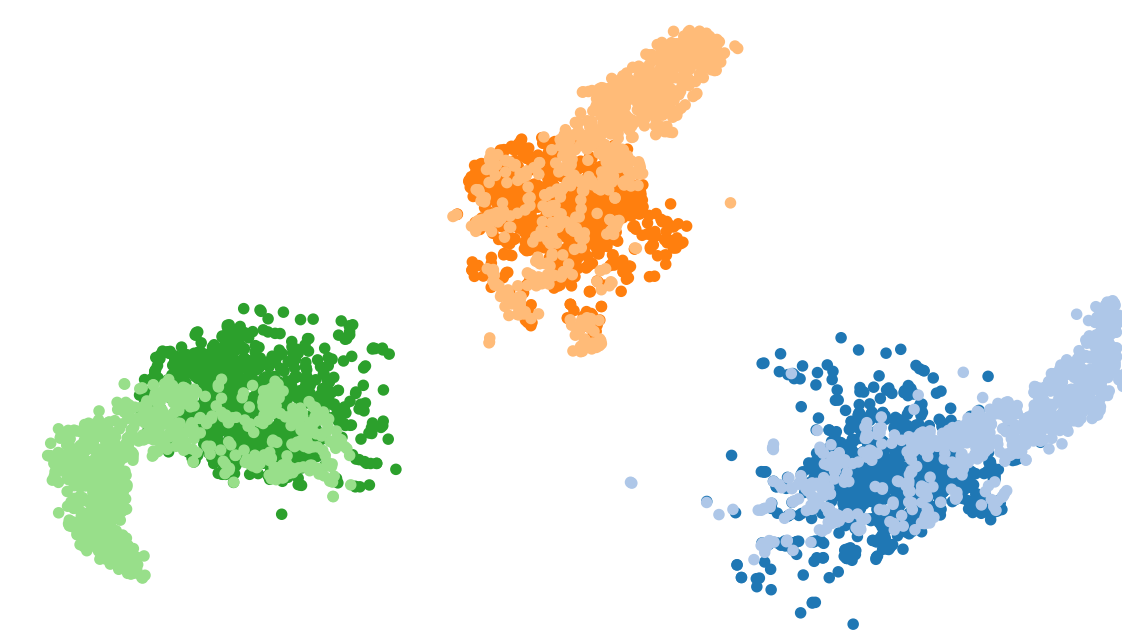

weather

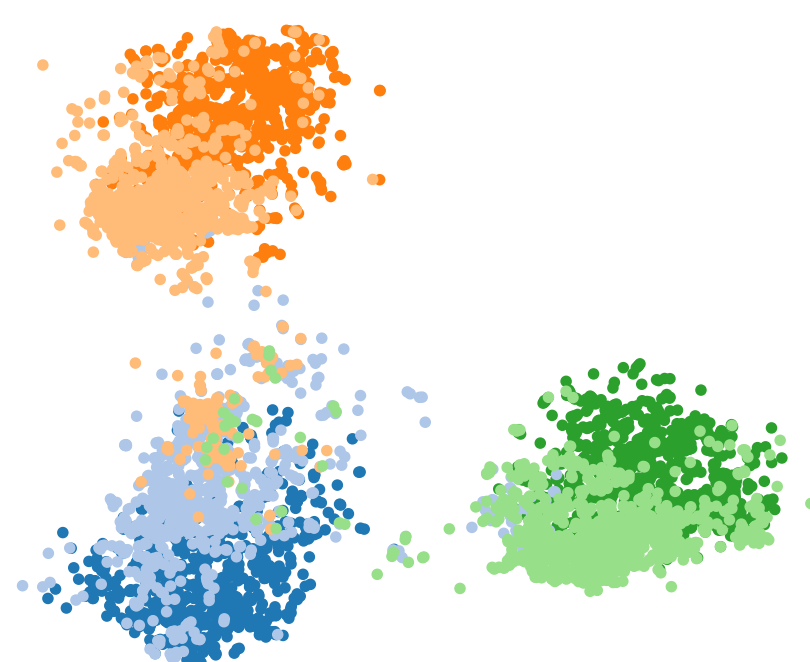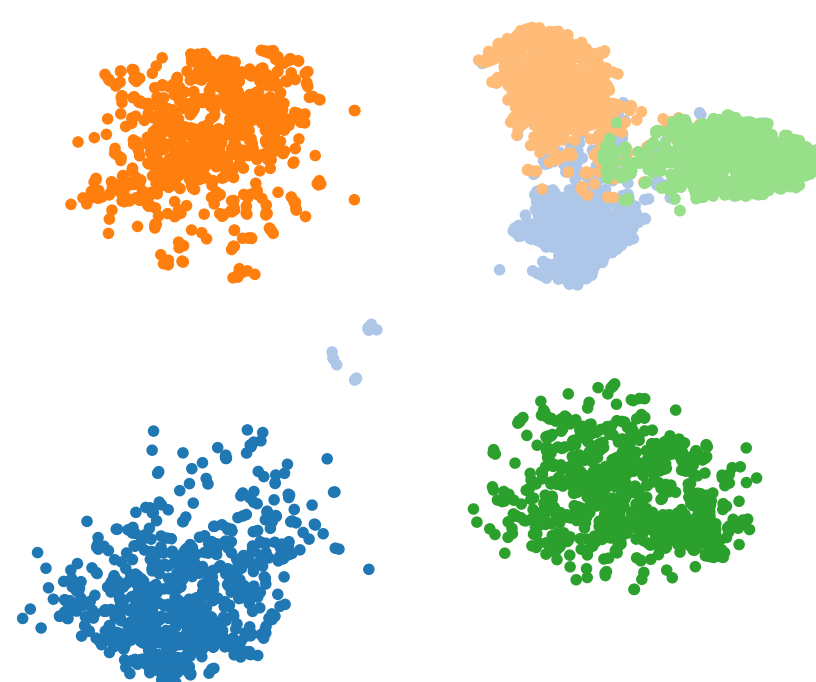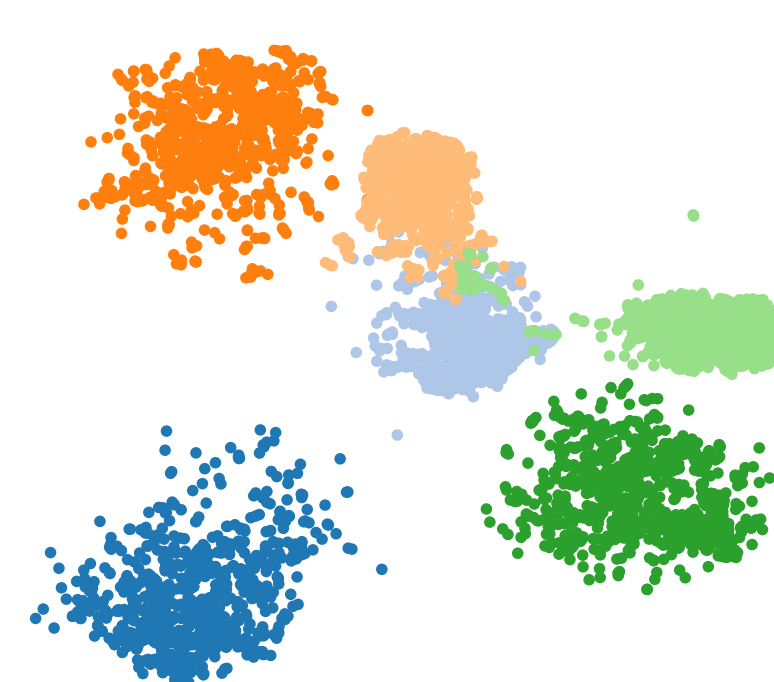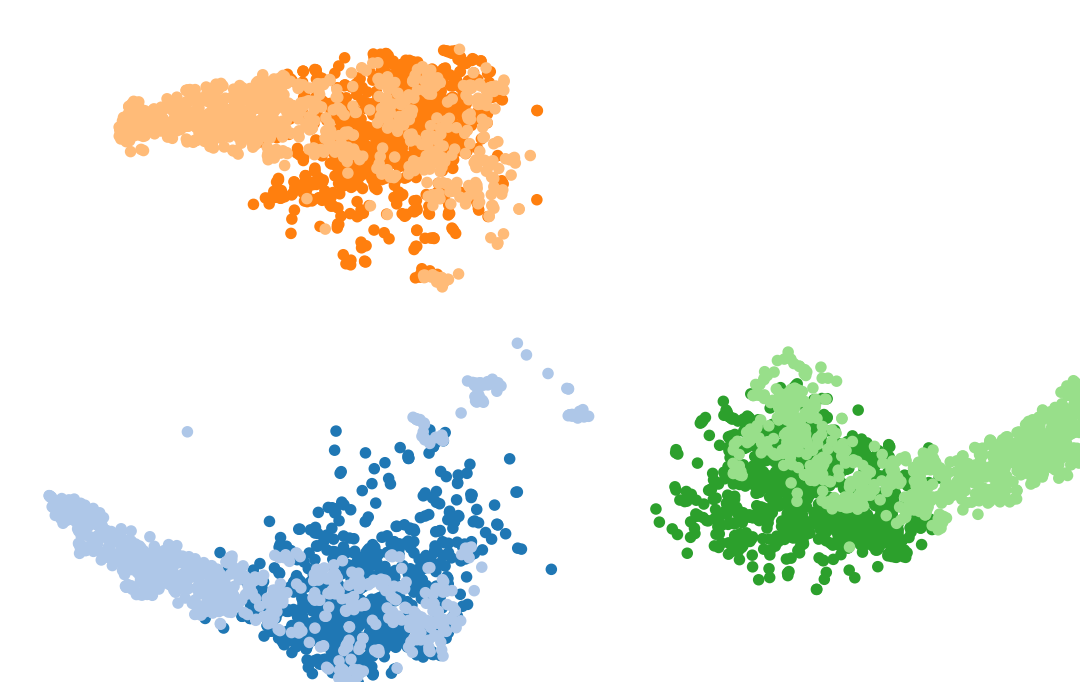

digital

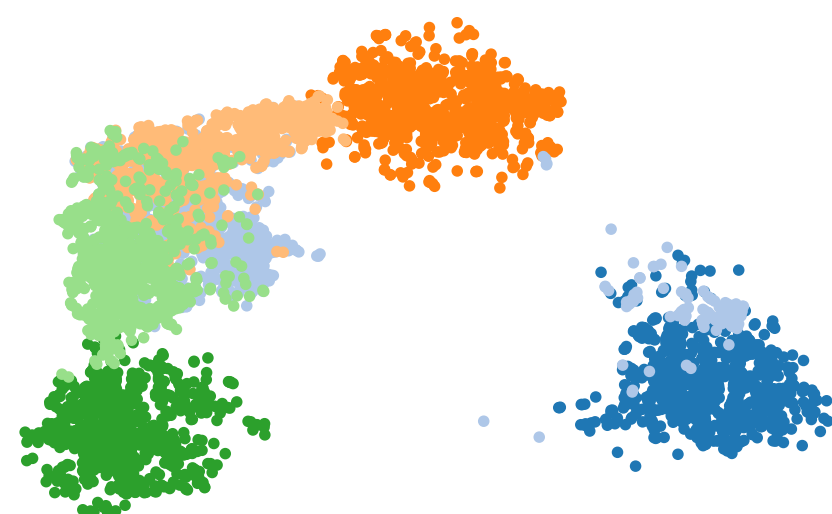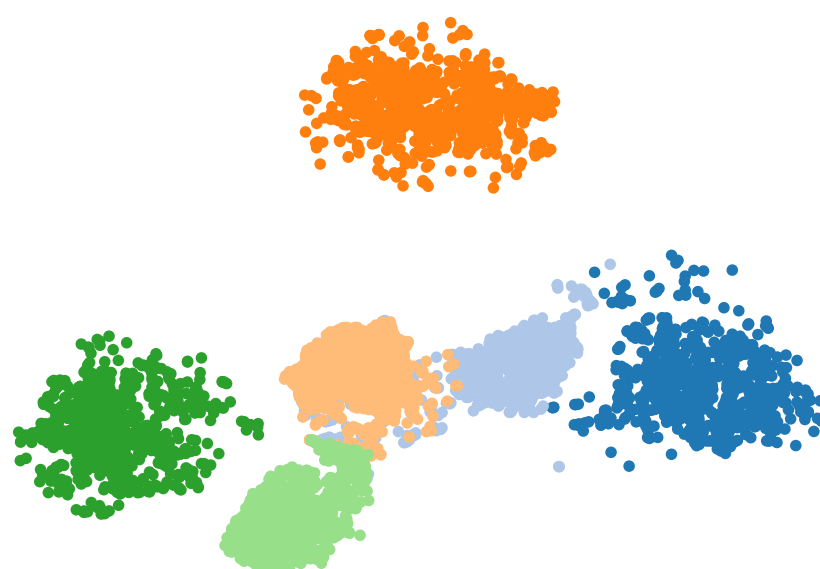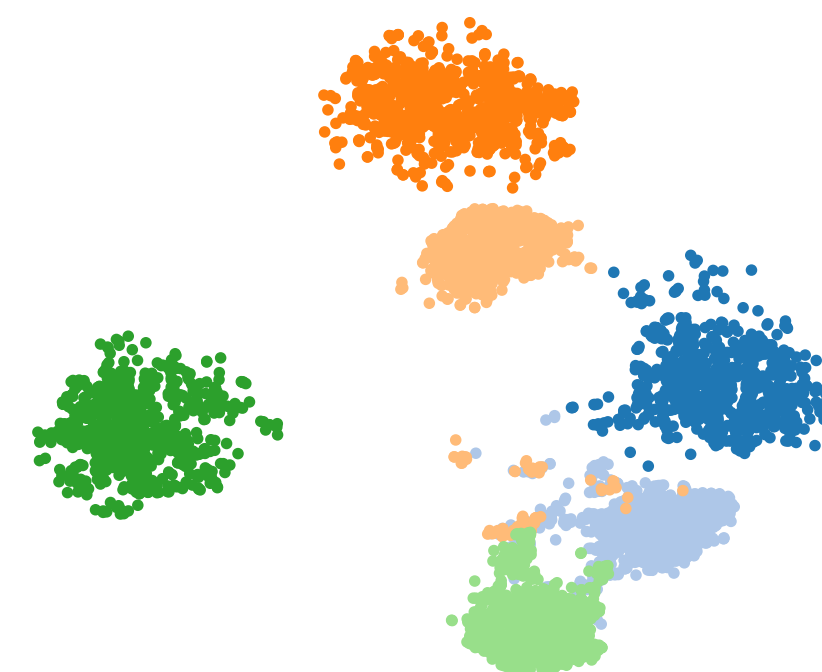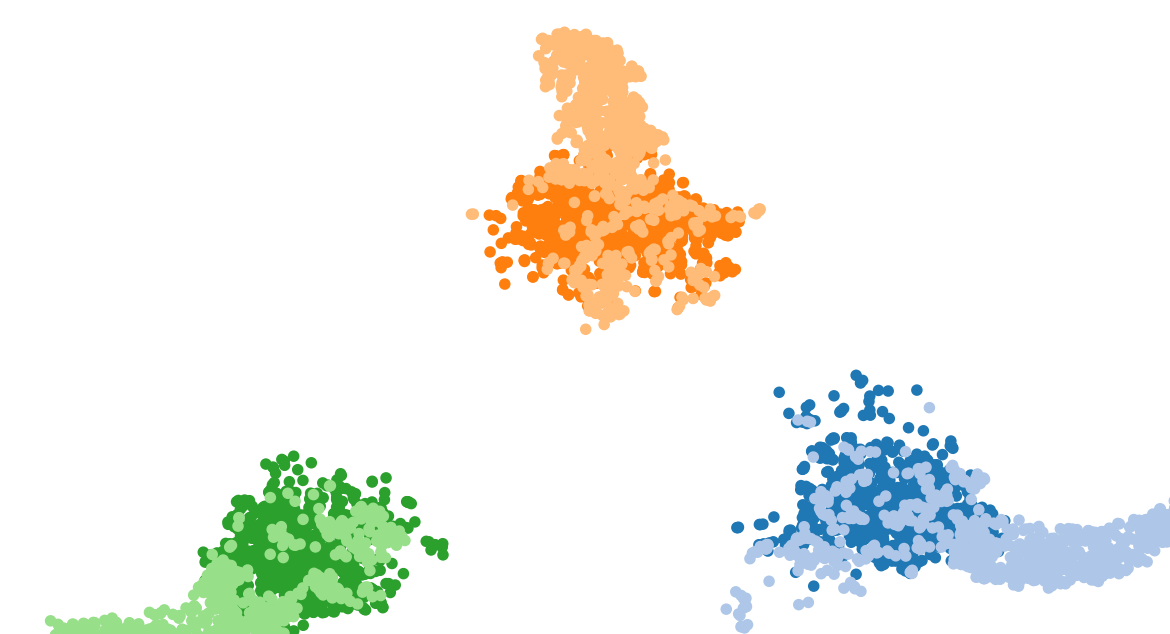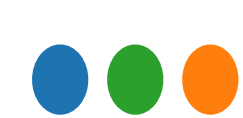

source domain

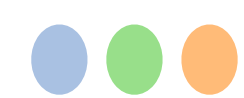

target domain

Supplement: supplementary_material [file attachment]
